# Supplementary material for: Identification of kinetin riboside as a repressor of CCND1 and CCND2 with preclinical antimyeloma activity
Source: JCI journal article supplement (doi:10.1172/jci34149), 2008-04-01
Supplement: sd1 [file 1]

**SUPPLEMENTAL DATA, FIGURES AND TABLES****SUPPLEMENTAL FIGURE LEGENDS**

**Supplemental Figure S1. Transactivation of the cyclin D2 promoter by c-maf in reporter NIH 3T3 cells.** Wild type NIH 3T3 cells (black) infected with control vector, or MAF over-expressing NIH 3T3 cells (gray), were transfected with a luciferase reporter gene expressed from the cyclin D2 promoter (p*CCND2*-luc), the cyclin D2 promoter in reverse orientation (p*CCND2* reverse-luc), a  $\beta$ -Gal plasmid (b-GAL) or with no plasmid (buffer only control). After transfection, cells were lysed and luciferase activity determined. Endogenous transcription from the *CCND2* promoter was detected and was responsive to retroviral MAF; transcription from the reverse-orientation *CCND2* promoter was weak and unresponsive to MAF.

**Supplemental Figure S2. Two color (CD138 | Annexin V) flow cytometric analysis of primary CD138+ myeloma cell response to Kinetin riboside**

Examples of the apoptotic response of CD138-selected primary multiple myeloma bone marrow tumor cells to Kinetin riboside 10  $\mu$ M or DMSO vehicle at 72h, analyzed by 2-color flow cytometry. While some primary tumor cells become Annexin V-positive simply from in vitro culture (and/or from treatment with DMSO vehicle) treatment with Kinetin riboside substantially enhances the apoptosis of primary myeloma cells, which become Annexin V-positive, CD138-negative.

**Supplemental Figure S3. Three-color (CD45 | CD38 | Annexin V) flow cytometric analysis of Kinetin riboside-induced apoptotic responses in primary MM patient bone marrow, by CD45 | CD38 compartments**

(A) Example of a myeloma patient bone marrow specimen containing 20-30% primary tumor cells treated with Kinetin riboside 5-10  $\mu$ M or DMSO vehicle for 72h and analyzed by 3-color flow cytometry. Forward scatter (FS) – side scatter (SS) (top, left column) and CD45 | CD38 subpopulations (top, right column) are shown. FS-SS gates for all cells (large gate) or cells with morphological characteristics of viable plasma cells (small gate) are illustrated; with Kinetin riboside treatment plasma cells become small and granular, suggesting cytotoxicity. All bone marrow cells in the large gate are separated by CD45 | CD38 characteristics (top, right column). Plasma cells represent >95% of CD38-positive cells. Gates on CD38-high, CD45-low/CD38-low and CD45-high/CD38-low subpopulations are shown; these subpopulations are further analyzed for Annexin V-positive apoptosis (bottom panels). Substantive apoptosis of the primary myeloma cell compartment occurs at low Kinetin riboside concentrations, alongside comparatively modest non-tumor cell apoptosis (most marked in CD45-high lymphocytes). (B) Compensation controls, showing cells stained with single antibodies, or no antibody, verifying absence of fluorochrome signal crossover between channels.

**Supplemental Figure S4. Transcriptional repressor isoforms of the cyclic AMP response element modulator (CREM) are induced by Kinetin riboside.**

(A) Ensembl contig map of the human *CREM* gene, showing its modular structure, variant mRNA transcripts and *CREM*-specific Affymetrix U133\_+2 probe-sets. (B) Relative expression of Affymetrix *CREM* 3'UTR- and exon-specific probe-sets in H929 or U266 cells 4h after treatment with Kinetin riboside, an unrelated cytotoxic agent, pristimerin, or DMSO vehicle. Three *CREM* probe-sets show specific increased expression of in both H929 and U266 cells after kinetin riboside treatment (indicated with \*) indicating induction of specific *CREM* isoform(s). Probe-sets 228093\_at and 210171\_s\_at, targeting exons found in *CREM* activator isoforms, are not up-regulated. (C) Correlation of *CREM* Affymetrix probe-set expression (normalized per tumor line to DMSO-treated samples) with *CREM* transcript variants curated by the Sanger Institute Vega Havana Group. (D) *CREM* variants (Vega) able to account for *CREM* probe-set expression profile changes induced by Kinetin riboside; all are repressors of the cAMP response element (CRE).

**Supplemental Figure S5. Schematic of CRE and MARE sites in *CCND1* – *CCND3* promoters and model of repression of *CCND2* and *CCND1* by Kinetin riboside**

Evolutionarily-conserved cyclic AMP response elements (CRE) and MAF recognition elements (MARE) in *CCND1*, *CCND2* and *CCND3* 5' regulatory regions (1kb) are shown. The site have previously been identified and validated

by functional studies (1-7). The potent CRE repressor CREM / ICER is rapidly induced by Kinetin riboside (< 4 hrs) and is known to block the cAMP-response element (CRE) present in *CCND1* or *CCND2* (8, 9) located immediately 5' to the transcription initiation site. BACH2 is also induced and is a repressor of MARE and of the *IGH* enhancer (10-12) and thus is predicted to repress cyclin D gene expression when this is driven by MAF dysregulation or by translocation of a cyclin D gene to the *IGH* enhancer locus.

Supplemental Figure S1

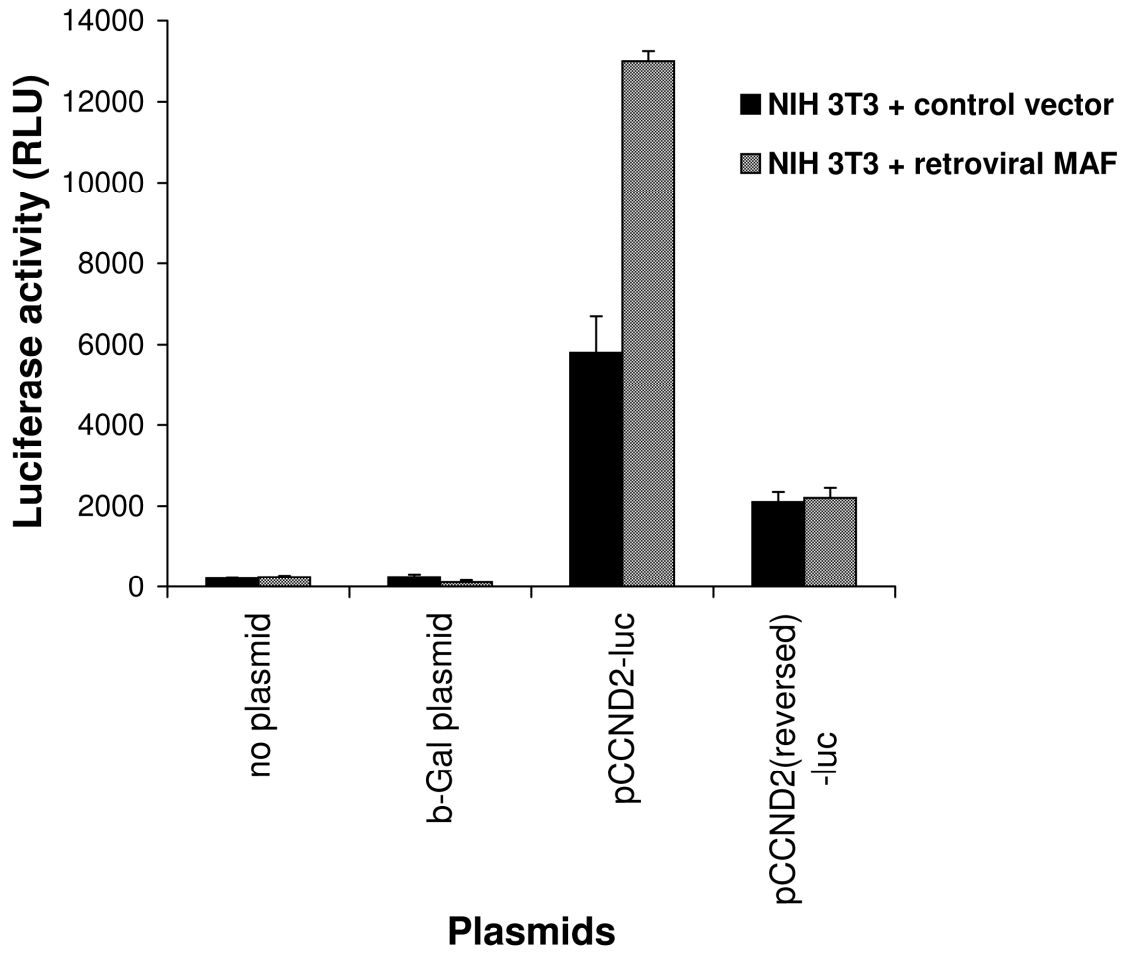

Supplemental Figure S2

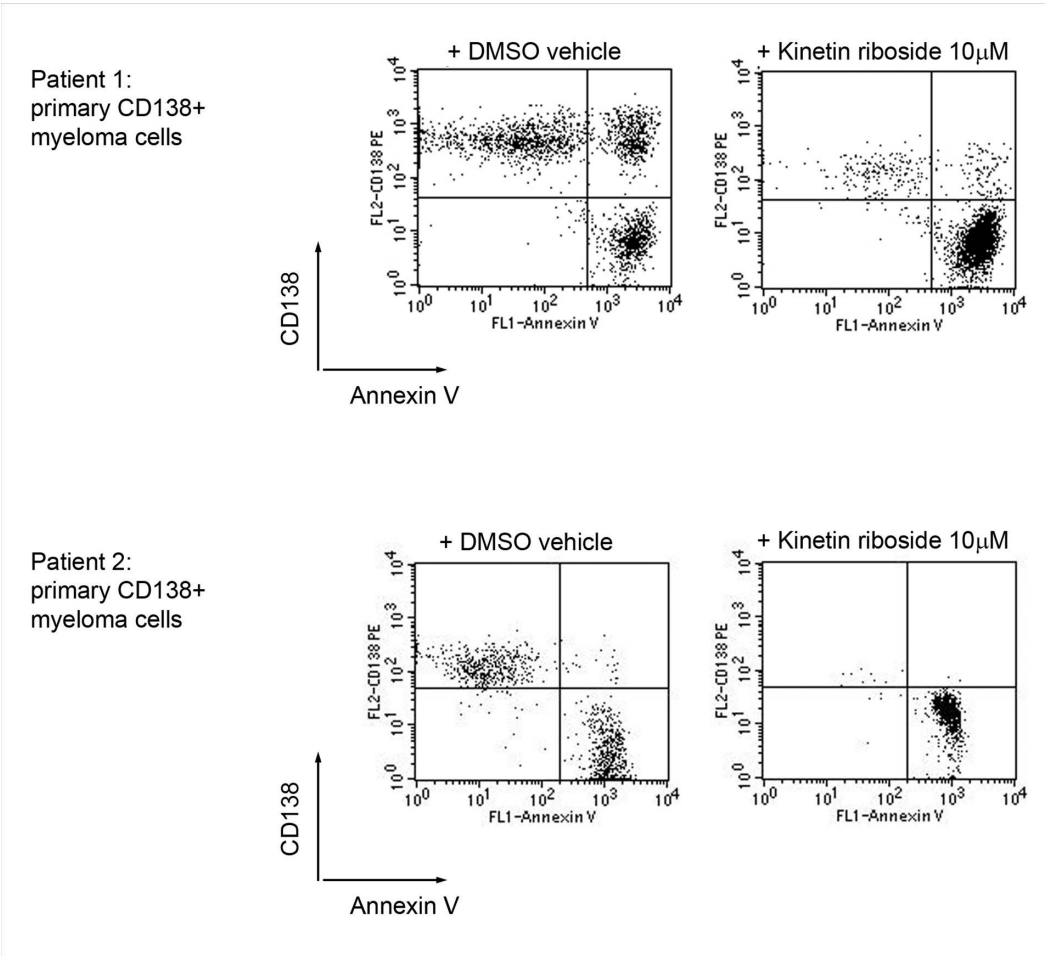

Bone marrow compartments (FSC|SSC, CD38|CD45)

DMSO

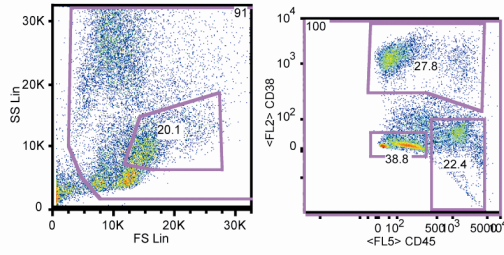

Kinetin riboside  
5uM, 72h

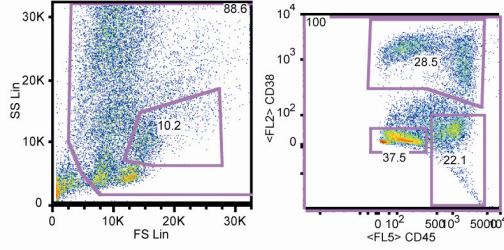

Kinetin riboside  
10uM, 72h

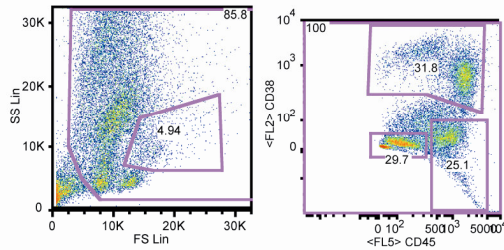

Apoptotic response, by bone marrow compartment

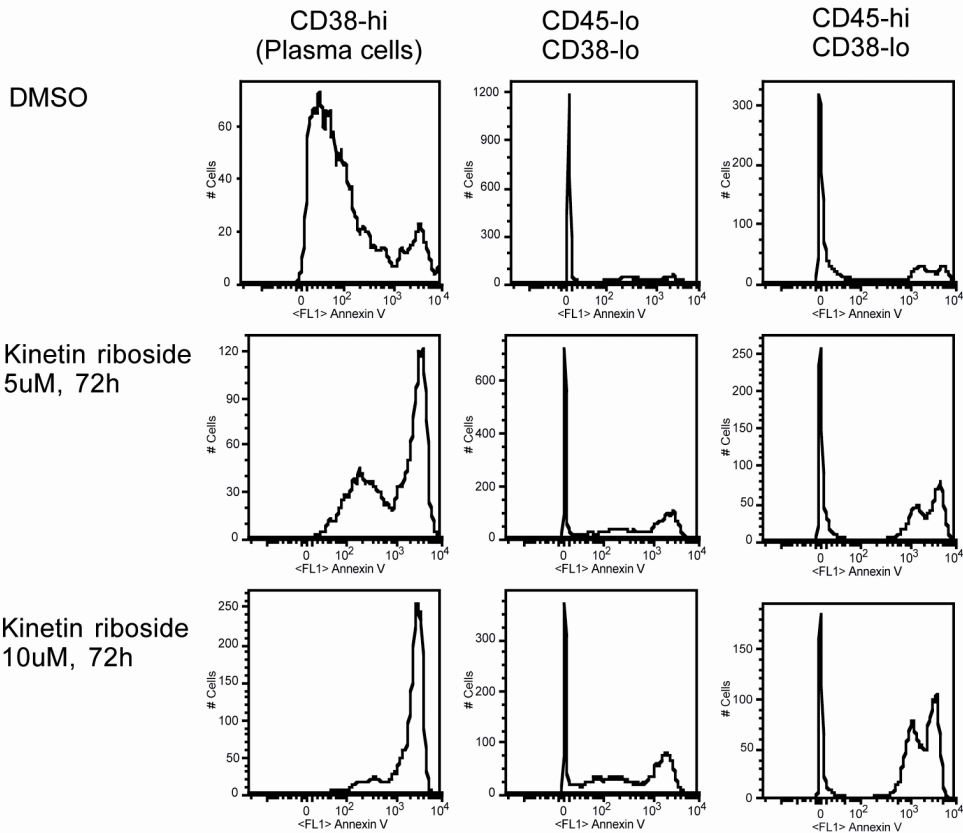

Supplemental Figure S3B

Compensation controls, 3-color staining

No Ab

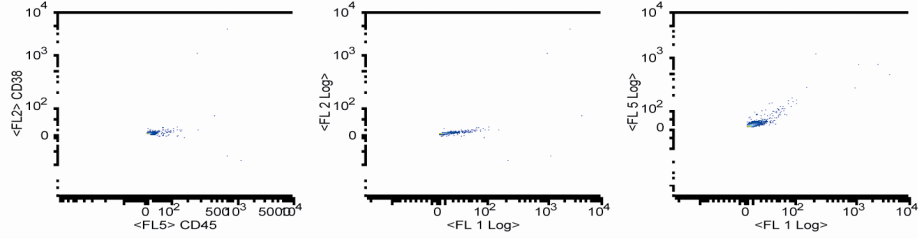

Annexin V  
FITC <FL1>  
antibody only

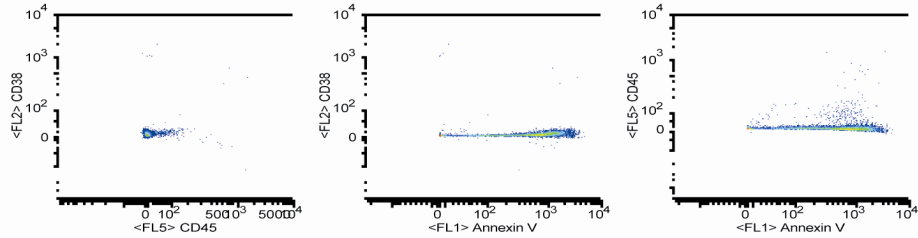

CD45  
PE-CY7 <FL5>  
antibody only

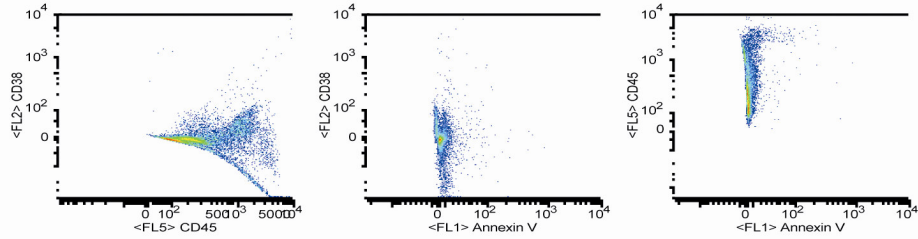

CD38  
PE <FL2>  
antibody only

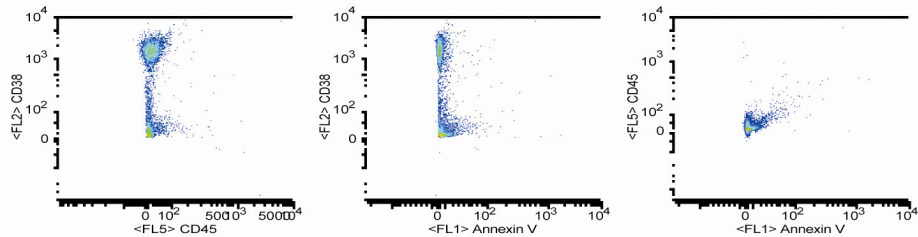



A

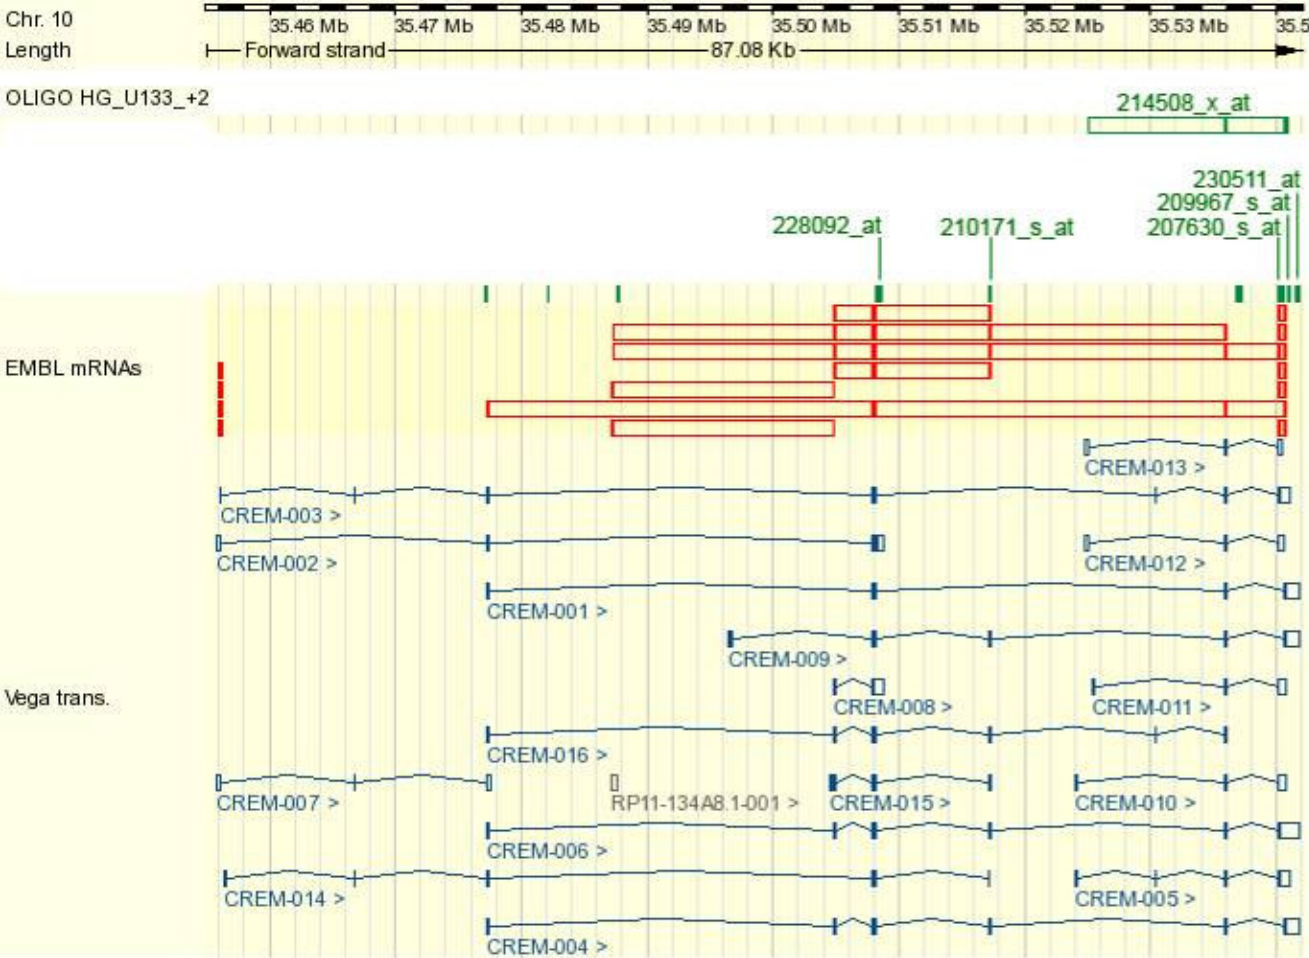

Supplemental Figure S4 cont.

B

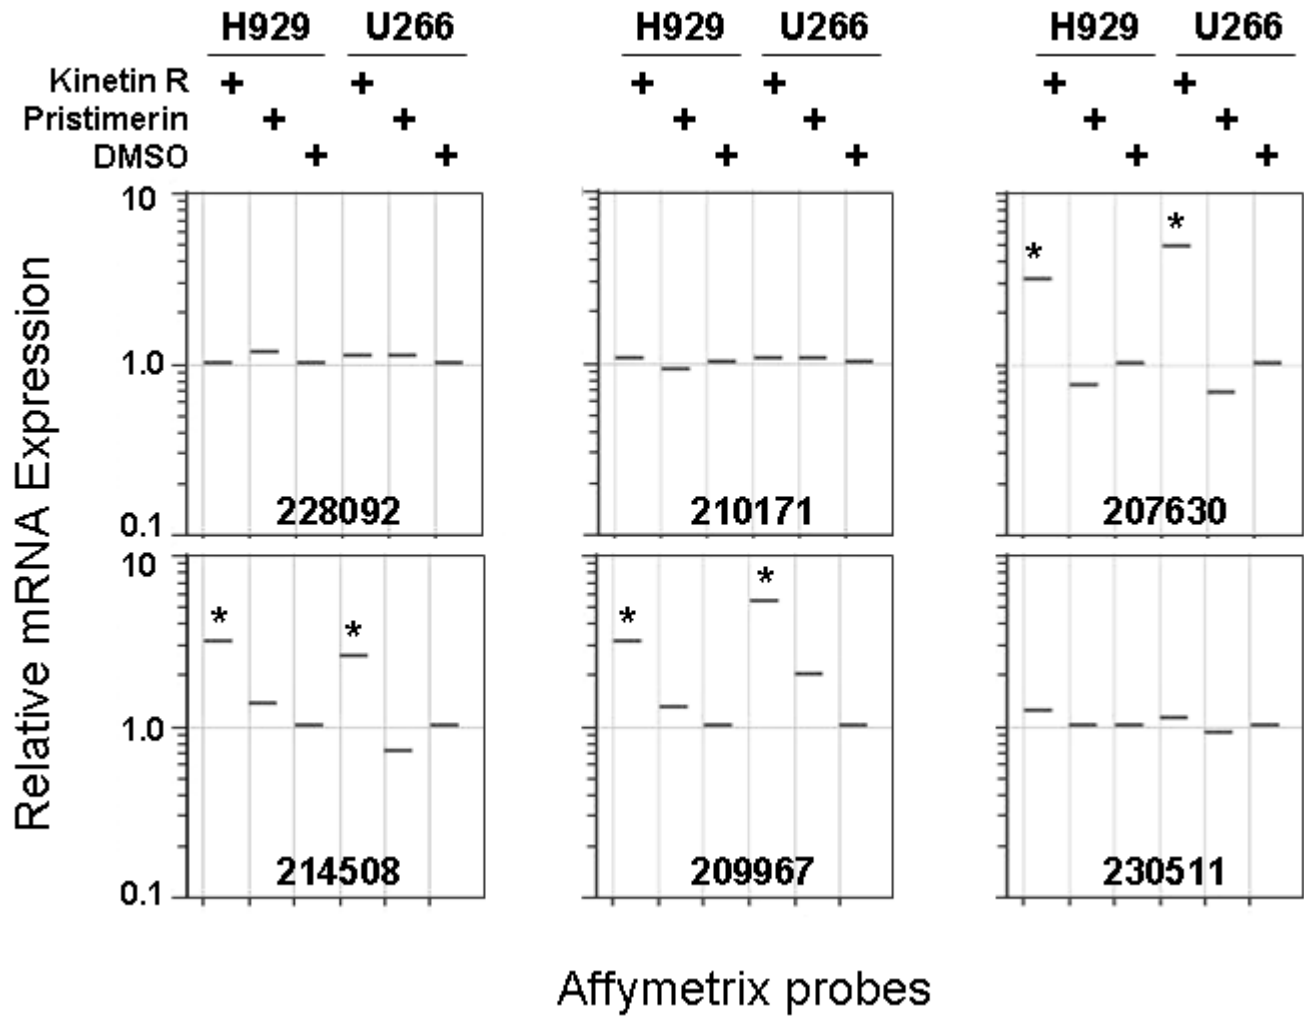

## Supplemental Figure S4 cont.

**C Correlation of *CREM* gene transcripts and Affymetrix *CREM* probe-sets induced by Kinetin riboside**

| Hg_U133_plus2 probe-set | Fold change in expression after Kinetin riboside treatment* |      | <i>CREM</i> transcript variants targeted by probe-set <sup>†</sup> | Interpretation of transcript expression       |
|-------------------------|-------------------------------------------------------------|------|--------------------------------------------------------------------|-----------------------------------------------|
|                         | H929                                                        | U266 |                                                                    |                                               |
| 228092                  | 1.04                                                        | 1.14 | 002, 008                                                           | Not induced                                   |
| 210171                  | 1.09                                                        | 1.04 | 004, 006, 009, 015, 016                                            | Not induced                                   |
| 207630                  | 3.18                                                        | 4.88 | 003, 005, 006, 010, 011, 012                                       | At least one: 003, 005, 010, 011, 012 Induced |
| 214508                  | 3.18                                                        | 2.65 | 001, 003, 004, 005, 006, 009, 010, 011                             | At least one: 003, 005, 010, 011 Induced      |
| 209967                  | 3.12                                                        | 5.41 | 001, 003, 004, 009                                                 | 003 Induced                                   |
| 230511                  | 1.23                                                        | 1.14 | 001, 004, 006, 009                                                 | Not induced                                   |

\*Expression of probe-set target mRNA sequences was quantified by gene expression profiling 4hrs after treatment and is shown as the ratio of expression in Kinetin riboside-treated cells to DMSO vehicle-treated cells

<sup>†</sup>Vega transcript nomenclature from Sanger Institute Havana Group (curated). Transcript variants in italics are potential targets of the indicated probe-set but are also targets of probe-sets that show no induced expression, excluding them as the induced transcript

**D *CREM* variants induced by Kinetin riboside are repressors of the cAMP response element (CRE)**

| CREM transcript Variant* | Protein Isoform / Name           | Function                     |
|--------------------------|----------------------------------|------------------------------|
| 003                      | hCREM type1 alpha (isoform s)    | type alpha repressor isoform |
| 005                      | ICER1 hCREM 2alpha-a (isoform d) | early repressor ICER isoform |
| 010, 011, 012            | Non-coding / no isoform          |                              |

\*Transcript nomenclature from Sanger Institute's Havana Group, Vega database.

Supplemental Figure S5

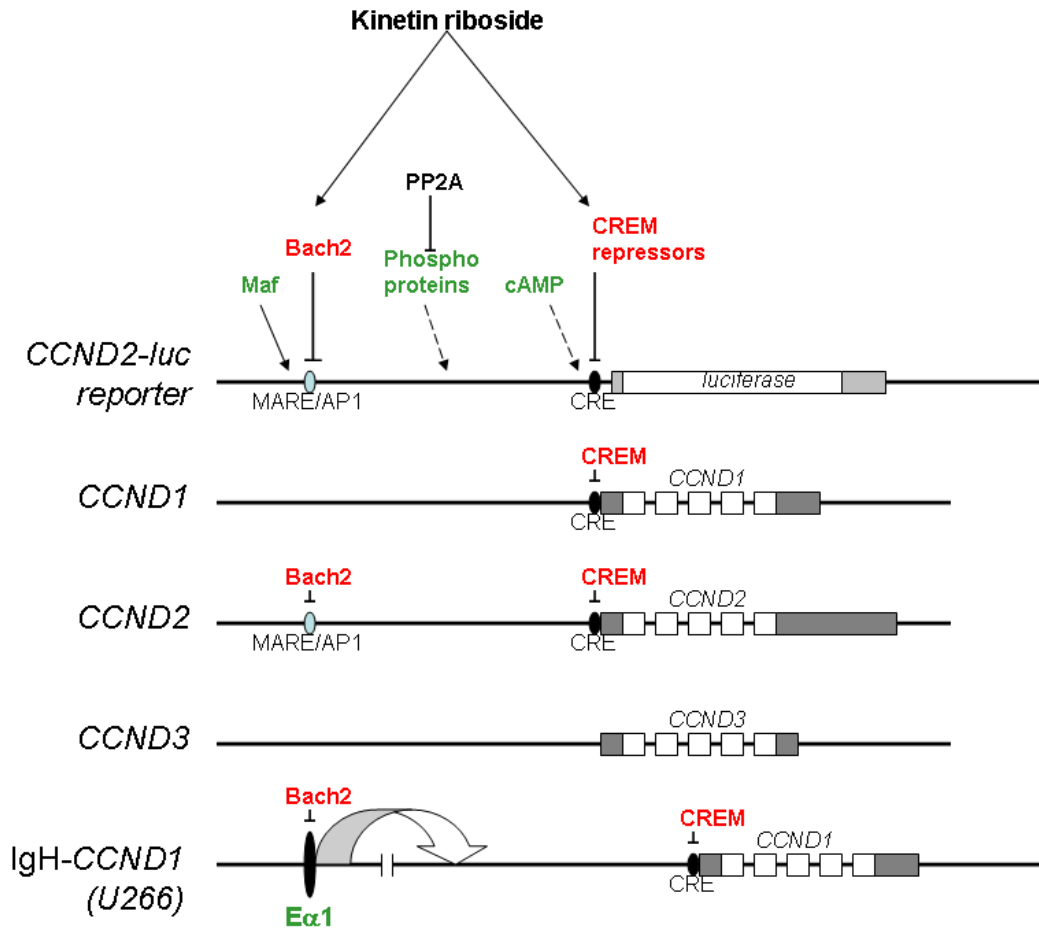

**SUPPLEMENTAL TABLE S1. Lentivirus clones and shRNA used in functional studies**

| <b>Gene</b>  | <b>Lentivirus clone</b> | <b>shRNA</b>                                                   |
|--------------|-------------------------|----------------------------------------------------------------|
| <i>CCND1</i> | NM_053056.1-2322        | CCGGGCCAGGATGATAAGTTCCTTTCTCG<br>AGAAAGGAACTTATCATCCTGGCTTTTTG |
| <i>CCND2</i> | NM_001759.2-380         | CCGGCCTTCCGCAGTGCTCCTACTTCTCGA<br>GAAGTAGGAGCACTGCGGAAGGTTTTTG |

**SUPPLEMENTARY TABLE S2. Genes up- or down-regulated >3 fold in  
H929 and U266 myeloma tumor lines in response to Kinetin riboside (KR)  
10 $\mu$ M vs control DMSO treatment at 4h, by Affymetrix microarray**

| Probeset     | Gene     | Fold change in expression |                 | MAS5 Present(P)/Absent(A) flag |            |              |            |
|--------------|----------|---------------------------|-----------------|--------------------------------|------------|--------------|------------|
|              |          | H929<br>KR:DMSO           | U266<br>KR:DMSO | H929<br>DMSO                   | H929<br>KR | U266<br>DMSO | U266<br>KR |
| 221641_s_at  | ACOT9    | 3.4                       | 3.9             | P                              | P          | P            | P          |
| 212543_at    | AIM1     | 7.2                       | 6.8             | A                              | P          | P            | P          |
| 208836_at    | ATP1B3   | 3.2                       | 3.2             | P                              | P          | P            | P          |
| 218631_at    | AVPI1    | 5.7                       | 3.4             | P                              | P          | P            | P          |
| 221234_s_at  | BACH2    | 15.1                      | 7.5             | P                              | P          | P            | P          |
| 207571_x_at  | C1orf38  | 6.9                       | 4.0             | P                              | P          | P            | P          |
| 210785_s_at  | C1orf38  | 7.0                       | 3.3             | P                              | P          | P            | P          |
| 1555950_a_at | CD55     | 7.9                       | 3.4             | P                              | P          | A            | P          |
| 204637_at    | CGA      | 34.4                      | 13.0            | A                              | P          | A            | P          |
| 207630_s_at  | CREM     | 3.2                       | 4.9             | P                              | P          | P            | P          |
| 209967_s_at  | CREM     | 3.1                       | 5.4             | P                              | P          | A            | P          |
| 206085_s_at  | CTH      | 5.3                       | 3.4             | P                              | P          | P            | P          |
| 217127_at    | CTH      | 5.0                       | 3.8             | P                              | P          | P            | P          |
| 212503_s_at  | DIP2C    | 3.9                       | 3.2             | A                              | P          | P            | P          |
| 204014_at    | DUSP4    | 7.9                       | 22.9            | P                              | P          | A            | P          |
| 204015_s_at  | DUSP4    | 13.8                      | 17.1            | P                              | P          | A            | P          |
| 205409_at    | FOSL2    | 3.9                       | 4.6             | A                              | P          | A            | P          |
| 218880_at    | FOSL2    | 7.8                       | 10.8            | A                              | P          | A            | P          |
| 218881_s_at  | FOSL2    | 4.0                       | 5.6             | A                              | P          | A            | P          |
| 225262_at    | FOSL2    | 4.9                       | 19.1            | A                              | P          | A            | P          |
| 203397_s_at  | GALNT3   | 9.5                       | 5.4             | P                              | P          | P            | P          |
| 214430_at    | GLA      | 3.1                       | 12.2            | P                              | P          | P            | P          |
| 202814_s_at  | HEXIM1   | 4.2                       | 5.4             | P                              | P          | P            | P          |
| 213793_s_at  | HOMER1   | 3.9                       | 7.4             | P                              | P          | P            | P          |
| 226651_at    | HOMER1   | 3.4                       | 5.2             | P                              | P          | P            | P          |
| 226352_at    | JMY      | 4.2                       | 3.5             | P                              | P          | P            | P          |
| 241985_at    | JMY      | 15.3                      | 10.3            | P                              | P          | P            | P          |
| 201751_at    | JOSD1    | 4.6                       | 3.0             | P                              | P          | P            | P          |
| 212733_at    | KIAA0226 | 3.5                       | 3.2             | P                              | P          | P            | P          |
| 219371_s_at  | KLF2     | 0.2                       | 0.3             | P                              | P          | P            | M          |
| 222068_s_at  | LRRC50   | 17.3                      | 6.5             | P                              | P          | P            | P          |
| 202340_x_at  | NR4A1    | 7.3                       | 4.1             | A                              | P          | A            | P          |

## Supplemental Data

|              |          |      |      |   |   |   |   |
|--------------|----------|------|------|---|---|---|---|
| 207978_s_at  | NR4A3    | 12.7 | 12.2 | A | P | A | P |
| 209959_at    | NR4A3    | 11.4 | 10.5 | A | P | A | P |
| 1555167_s_at | PBEF1    | 6.5  | 4.6  | P | P | P | P |
| 217739_s_at  | PBEF1    | 6.5  | 5.4  | P | P | P | P |
| 209621_s_at  | PDLIM3   | 5.8  | 4.0  | P | P | P | P |
| 210170_at    | PDLIM3   | 5.5  | 9.1  | A | P | P | P |
| 238592_at    | PDLIM3   | 6.0  | 7.7  | P | P | P | P |
| 218319_at    | PELI1    | 7.1  | 3.1  | P | P | P | P |
| 202388_at    | RGS2     | 10.2 | 8.6  | A | P | A | P |
| 1553962_s_at | RHOB     | 5.2  | 3.7  | A | P | P | P |
| 212099_at    | RHOB     | 5.2  | 21.4 | P | P | P | P |
| 230333_at    | SAT      | 9.5  | 6.3  | P | P | A | P |
| 203455_s_at  | SAT1     | 20.9 | 39.1 | P | P | P | P |
| 210592_s_at  | SAT1     | 23.8 | 34.1 | P | P | P | P |
| 213988_s_at  | SAT1     | 16.6 | 19.7 | A | P | A | P |
| 218872_at    | TESC     | 6.5  | 3.6  | P | P | P | P |
| 224836_at    | TP53INP2 | 4.3  | 3.7  | A | P | P | P |
| 204141_at    | TUBB2A   | 6.2  | 3.5  | P | P | A | P |
| 208622_s_at  | VIL2     | 4.7  | 3.2  | P | P | P | P |
| 210561_s_at  | WSB1     | 3.2  | 3.1  | P | P | P | P |
| 217783_s_at  | YPEL5    | 5.0  | 5.4  | P | P | P | P |
| 222408_s_at  | YPEL5    | 4.6  | 6.6  | P | P | P | P |
| 226034_at    | ---      | 9.1  | 25.4 | P | P | A | P |
| 227200_at    | ---      | 4.3  | 3.3  | P | P | P | P |
| 227539_at    | ---      | 7.3  | 4.6  | A | P | P | P |
| 228188_at    | ---      | 13.9 | 12.7 | A | P | A | P |
| 228498_at    | ---      | 5.2  | 4.5  | P | P | P | P |
| 239277_at    | ---      | 3.3  | 3.7  | M | P | P | P |

## REFERENCES FOR SUPPLEMENTAL ANALYSIS

1. Boulon, S., Dantonel, J.C., Binet, V., Vie, A., Blanchard, J.M., Hipskind, R.A., and Philips, A. 2002. Oct-1 potentiates CREB-driven cyclin D1 promoter activation via a phospho-CREB- and CREB binding protein-independent mechanism. *Mol. Cell Biol.* **22**:7769-7779.
2. Brooks, A.R., Shiffman, D., Chan, C.S., Brooks, E.E., and Milner, P.G. 1996. Functional analysis of the human cyclin D2 and cyclin D3 promoters. *J. Biol. Chem.* **271**:9090-9099.
3. Herber, B., Truss, M., Beato, M., and Muller, R. 1994. Inducible regulatory elements in the human cyclin D1 promoter. *Oncogene.* **9**:1295-1304.
4. Hurt, E.M., Wiestner, A., Rosenwald, A., Shaffer, A.L., Campo, E., Grogan, T., Bergsagel, P.L., Kuehl, W.M., and Staudt, L.M. 2004. Overexpression of c-maf is a frequent oncogenic event in multiple myeloma that promotes proliferation and pathological interactions with bone marrow stroma. *Cancer Cell.* **5**:191-199.
5. Krieger, S., Grunau, C., Sabbah, M., and Sola, B. 2005. Cyclin D1 gene activation in human myeloma cells is independent of DNA hypomethylation or histone hyperacetylation. *Exp. Hematol.* **33**:652-659.
6. Moriuchi, A., Ido, A., Nagata, Y., Nagata, K., Uto, H., Hasuike, S., Hori, T., Hirono, S., Hayashi, K., and Tsubouchi, H. 2003. A CRE and the region occupied by a protein induced by growth factors contribute to up-regulation of cyclin D1 expression in hepatocytes. *Biochem. Biophys. Res. Commun.* **300**:415-421.
7. White, P.C., Shore, A.M., Clement, M., McLaren, J., Soeiro, I., Lam, E.W., and Brennan, P. 2006. Regulation of cyclin D2 and the cyclin D2 promoter by protein kinase A and CREB in lymphocytes. *Oncogene* **25**:2170-2180.
8. Steigedal, T.S., Bruland, T., Misund, K., Thommesen, L., and Laegreid, A. 2007. Inducible cAMP early repressor suppresses gastrin-mediated activation of cyclin D1 and c-fos gene expression. *Am. J. Physiol. Gastrointest. Liver Physiol.* **292**:1062-1069.
9. Muniz, L.C., Yehia, G., Memin, E., Ratnakar, P.V., and Molina, C.A. 2006. Transcriptional Regulation of Cyclin D2 by the PKA Pathway and Inducible cAMP Early Repressor (ICER) in Granulosa Cells. *Biol. Reprod.* **75**:279-288
10. Muto, A., Hoshino, H., Madisen, L., Yanai, N., Obinata, M., Karasuyama, H., Hayashi, N., Nakauchi, H., Yamamoto, M., Groudine, M., et al. 1998. Identification of Bach2 as a B-cell-specific partner for small maf proteins that negatively regulate the immunoglobulin heavy chain gene 3' enhancer. *Embo J.* **17**:5734-5743.
11. Muto, A., Tashiro, S., Tsuchiya, H., Kume, A., Kanno, M., Ito, E., Yamamoto, M., and Igarashi, K. 2002. Activation of Maf/AP-1 repressor Bach2 by oxidative stress promotes apoptosis and its interaction with promyelocytic leukemia nuclear bodies. *J. Biol. Chem.* **277**:20724-20733.
12. Muto, A., Tashiro, S., Nakajima, O., Hoshino, H., Takahashi, S., Sakoda, E., Ikebe, D., Yamamoto, M., and Igarashi, K. 2004. The transcriptional programme of antibody class switching involves the repressor Bach2. *Nature.* **429**:566-571.
